# Supplementary material for: Unexpected activation of carbon–bromide bond promoted by palladium nanoparticles in Suzuki C–C couplings
Source: Royal Society of Chemistry journal article supplement (doi:10.1039/c0dt00201a), 2010-01-01

## Unexpected activation of carbon-bromide bond promoted by palladium nanoparticles in Suzuki C-C couplings

Delphine Sanhes,<sup>a</sup> Eva Raluy,<sup>a</sup> Stéphane Rétory,<sup>a</sup> Nathalie Saffon,<sup>b</sup> Emmanuelle Teuma<sup>a</sup> and Montserrat Gómez<sup>a</sup>

### Supplementary Information

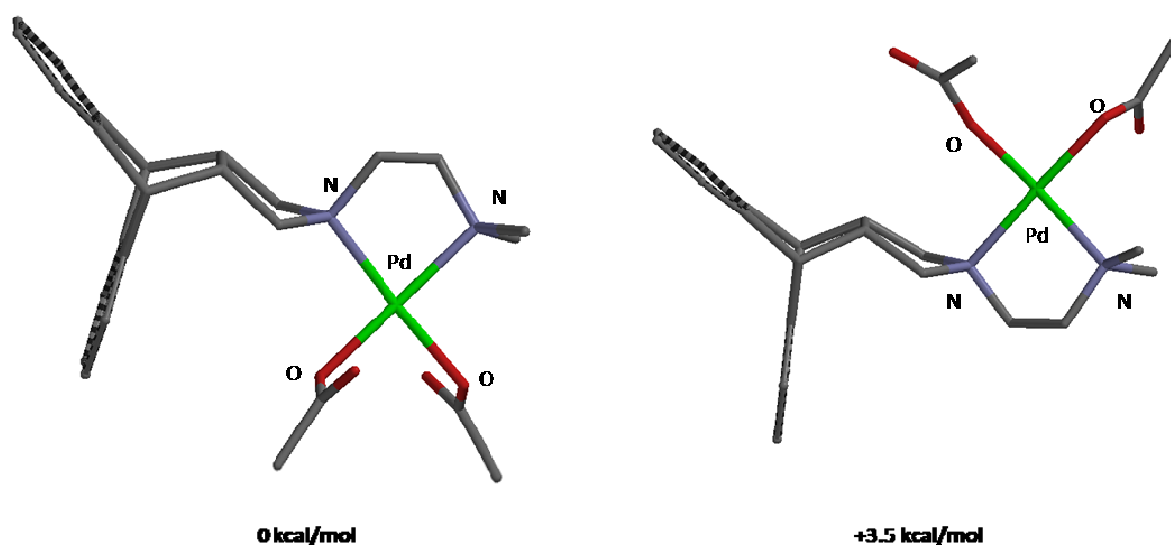

Fig. S1 Calculated structures (at DFT level) for both conformations of complex C6 with the data concerning the relative formation energy.

a)

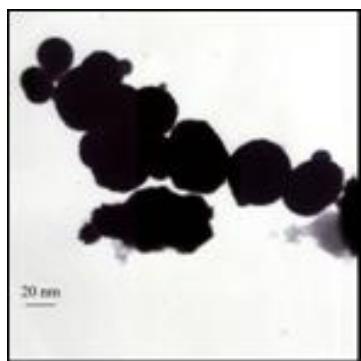

b)

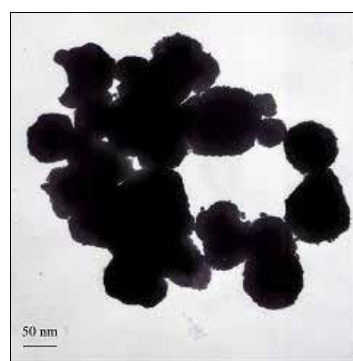

c)

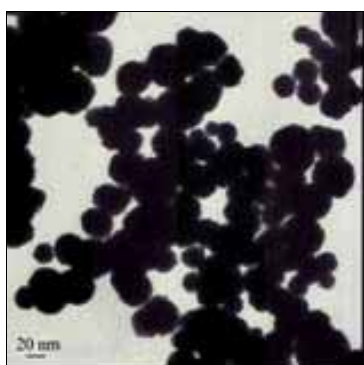

d)

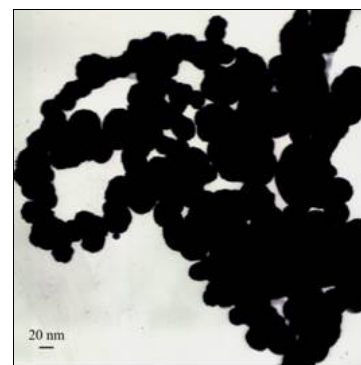

**Fig. S2** TEM micrographs of palladium particles from  $[\text{PdCl}_2(\text{cod})]$  and dispersed in THF: a) **Pd1a**; b) **Pd2a**; c) **Pd4a**; d) **Pd5a**.

| PdNP        | d (TEM) (nm)                     | IR (cm <sup>-1</sup> )                                                | Free ligand<br>IR (cm <sup>-1</sup> )                                        |
|-------------|----------------------------------|-----------------------------------------------------------------------|------------------------------------------------------------------------------|
| <b>Pd1a</b> | Agglomerates                     | 2959 (C-H), 1702 (C=O), 1465 (C=C)                                    | 2958 (C-H), 1702 (C=O), 1465 (C=C)                                           |
| <b>Pd2a</b> | Agglomerates                     | 3431 (O-H), 2959 (C-H), 1767-1697 (C=O), 1461 (C=C)                   | 3447 (O-H), 3026 (=C-H), 2961 (C-H), 1770 (C=O), 1702 (C=O), 1465-1458 (C=C) |
| <b>Pd4a</b> | Agglomerates                     | 2929 (C-H), 1454 (C=C)                                                | 3062 (=C-H), 2927 (C-H), 1654-1457 (C=C)                                     |
| <b>Pd5a</b> | Agglomerates                     | 3306 (O-H), 2924-2854 (C-H), 1647-1458 (C=C)                          | 3409 (O-H), 3064-3018 (=C-H), 2935-2788 (C-H), 1477-1456 (C=C)               |
| <b>Pd1b</b> | Agglomerates                     | 2958-2929 (C-H), 1701 (C=O), 1465 (C=C)                               | 2958 (C-H), 1702 (C=O), 1465 (C=C)                                           |
| <b>Pd2b</b> | Agglomerates                     | 3439 (O-H), 2963 (C-H), 1770-1688 (C=O), 1458 (C=C)                   | 3447 (O-H), 3026 (=C-H), 2961 (C-H), 1770 (C=O), 1702 (C=O), 1465-1458 (C=C) |
| <b>Pd4b</b> | Agglomerates                     | 2922 (C-H), 1458 (C=C)                                                | 3062 (=C-H), 2927 (C-H), 1654-1457 (C=C)                                     |
| <b>Pd5b</b> | Agglomerates                     | 3310 (O-H), 2924-2854 (C-H), 1458 (C=C)                               | 3409 (O-H), 3064-3018 (=C-H), 2935-2788 (C-H), 1477-1456 (C=C)               |
| <b>Pd1c</b> | 3.5 ± 1.8 (Pd <sub>1542</sub> )  | 2958 (C-H), 1701 (C=O), 1458 (C=C)                                    | 2958 (C-H), 1702 (C=O), 1465 (C=C)                                           |
| <b>Pd2c</b> | 1.9 ± 0.5 (Pd <sub>247</sub> )   | 3401 (O-H), 3064-3018 (=C-H), 2923-2848 (C-H), 1684 (C=O), 1458 (C=C) | 3447 (O-H), 3026 (=C-H), 2961 (C-H), 1770 (C=O), 1702 (C=O), 1465-1458 (C=C) |
| <b>Pd3c</b> | Agglomerates                     | 2954-2846 (C-H), 1695 (C=O), 1464 (C=C)                               | 3072-3012 (=C-H), 2977-2815 (C-H), 1704 (C=O), 1479-1465 (C=C)               |
| <b>Pd4c</b> | 3.6 ± 1.2 (Pd <sub>1678</sub> )  | 2915-2841 (C-H), 1458 (C=C)                                           | 3062 (=C-H), 2927 (C-H), 1654-1457 (C=C)                                     |
| <b>Pd5c</b> | 2.4 ± 0.9 (Pd <sub>497</sub> )   | 3425 (O-H), 2959-2856 (C-H), 1638 (C=C)                               | 3409 (O-H), 3064-3018 (=C-H), 2935-2788 (C-H), 1477-1456 (C=C)               |
| <b>Pd6c</b> | 2.0 ± 0.8 (Pd <sub>288</sub> )   | 2959-2863 (C-H), 1617-1457 (C=C)                                      | 3065-3017 (=C-H), 2935-2774 (C-H), 1466-1456 (C=C)                           |
| <b>Pd1d</b> | Agglomerates                     | 2961-2853 (C-H), 1700 (C=O), 1650-1465 (C=C)                          | 2958 (C-H), 1702 (C=O), 1465 (C=C)                                           |
| <b>Pd2d</b> | 1.41 ± 0.62 (Pd <sub>101</sub> ) | 3398 (O-H), 2963-2848 (C-H), 1767-1696 (C=O)                          | 3447 (O-H), 3026 (=C-H), 2961 (C-H), 1770 (C=O), 1702 (C=O), 1465-1458 (C=C) |
| <b>Pd3d</b> | Agglomerates                     | 2960-2852 (C-H), 1702 (C=O), 1458 (C=C)                               | 3072-3012 (=C-H), 2977-2815 (C-H), 1704 (C=O), 1479-1465 (C=C)               |
| <b>Pd4d</b> | Agglomerates                     | 2922 (C-H), 1561 (C=C)                                                | 3062 (=C-H), 2927 (C-H), 1654-1457 (C=C)                                     |
| <b>Pd5d</b> | 1.93 ± 0.77 (Pd <sub>259</sub> ) | 3395 (O-H), 2959-2849 (C-H), 1561 (C=C)                               | 3409 (O-H), 3064-3018 (=C-H), 2935-2788 (C-H), 1477-1456 (C=C)               |
| <b>Pd6d</b> | Agglomerates                     | 2959-2863 (C-H), 1457 (C=C)                                           | 3065-3017 (=C-H), 2935-2774 (C-H), 1466-1456 (C=C)                           |

**Table S1** Diameter and IR data for PdNP, and IR data for ligands **1-6**

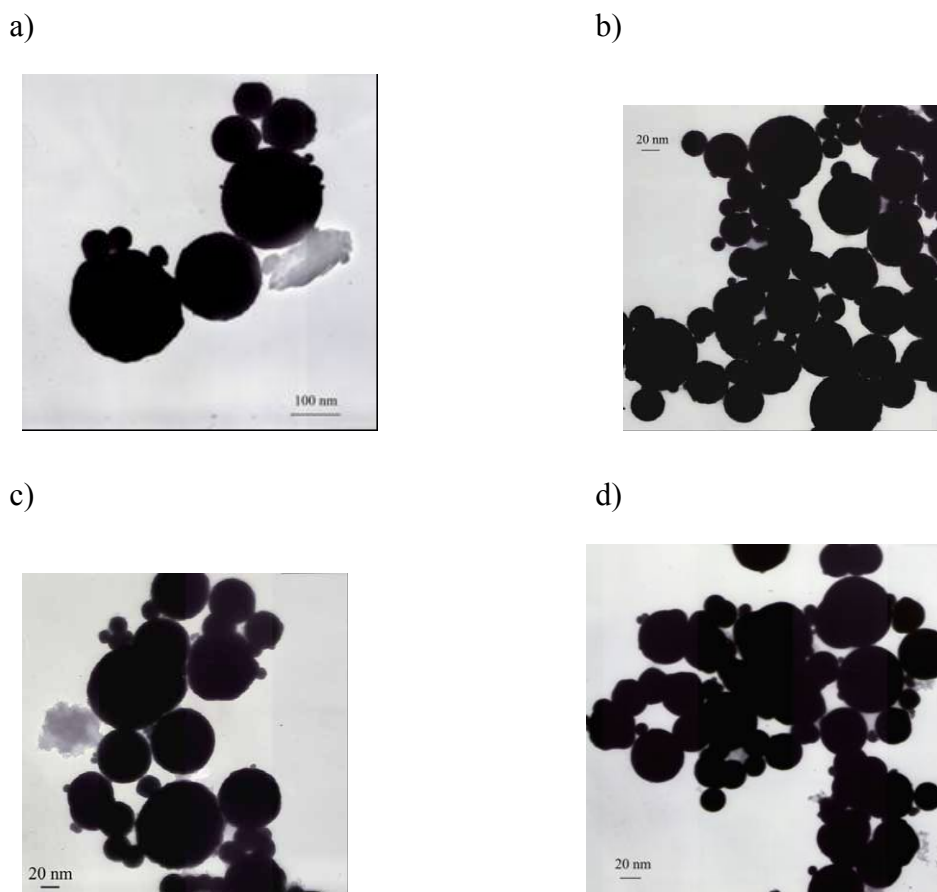

**Fig. S3** TEM micrographs of palladium particles from  $[\text{Pd}(\eta^3\text{-C}_3\text{H}_5)\text{Cl}]_2$  and dispersed in THF: a) **Pd1b**; b) **Pd2b**; c) **Pd4b**; d) **Pd5b**.

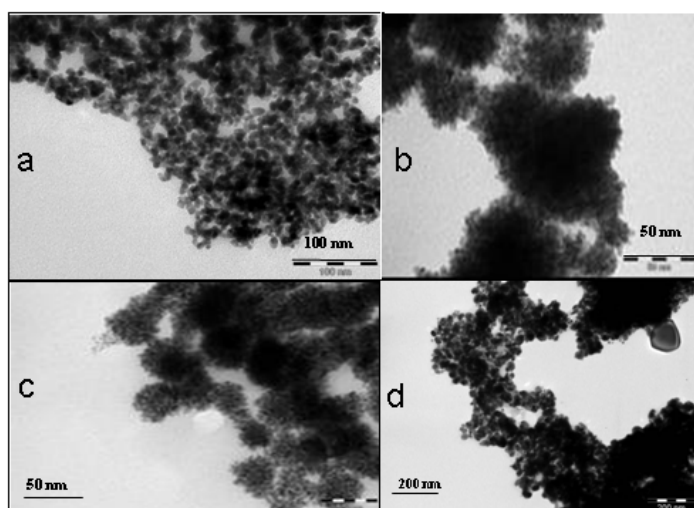

**Fig. S4** TEM micrographs of palladium particles from  $[\text{Pd}(\text{ma})(\text{nb})]$  and dispersed in THF: a) **Pd1d**; b) **Pd3d**; c) **Pd4d** and d) **Pd6d**.

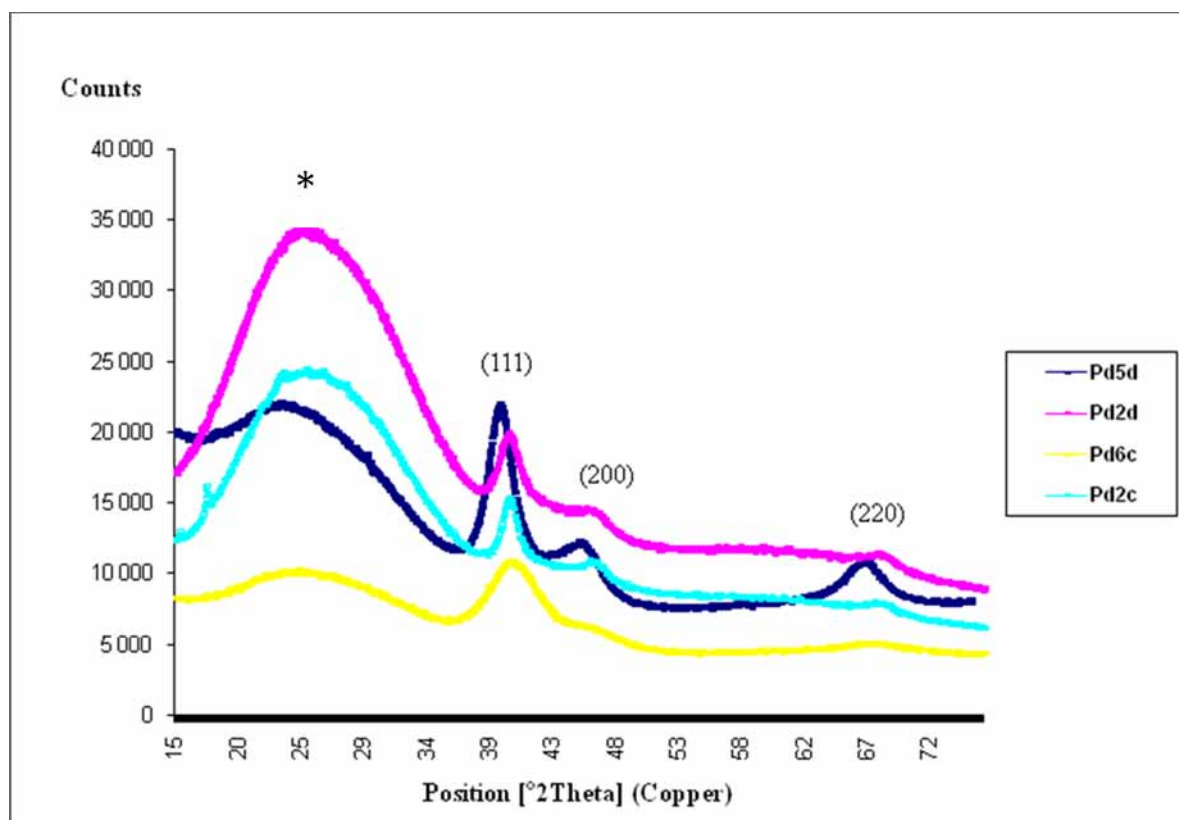

**Fig. S5** X-ray powder diffraction (XRD) of **Pd2c**, **Pd6c**, **Pd2d** and **Pd5d**. \* denotes amorphous material due to the glass capillary. Below, peak list and stick pattern for Pd showing fcc crystal structure.

### Peak list

| No. | h | k | l | d [Å]   | 2Theta [deg] | I [%] |
|-----|---|---|---|---------|--------------|-------|
| 1   | 1 | 1 | 1 | 2.30420 | 39.060       | 100.0 |
| 2   | 2 | 0 | 0 | 1.99550 | 45.414       | 44.2  |
| 3   | 2 | 2 | 0 | 1.41103 | 66.174       | 21.4  |
| 4   | 3 | 1 | 1 | 1.20333 | 79.605       | 21.2  |
| 5   | 2 | 2 | 2 | 1.15210 | 83.919       | 5.9   |

### Stick Pattern

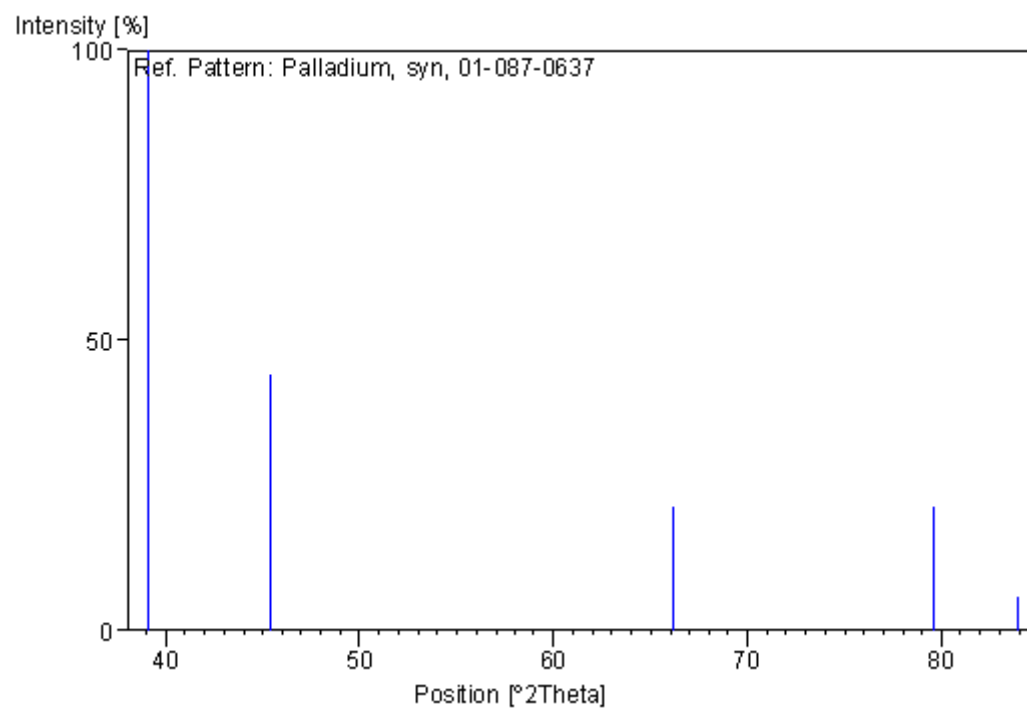

Supplement: c0dt00201a.pdf [file c0dt00201a.pdf]
